# Supplementary material
Source: publisher figshare collection journal article supplement (https://acs.figshare.com/ndownloader/files/4263385)
Supplement: Supplementary file 1 [file 4263385]

data_8613a
 
_audit_creation_method            SHELXL-97
_chemical_name_systematic
;
 ?
;
_chemical_name_common             ?
_chemical_melting_point           ?
_chemical_formula_moiety          'C27 H19 N1 O3'
_chemical_formula_sum             'C27 H19 N O3'
_chemical_formula_weight          405.43
 
loop_
 _atom_type_symbol
 _atom_type_description
 _atom_type_scat_dispersion_real
 _atom_type_scat_dispersion_imag
 _atom_type_scat_source
 'C'  'C'   0.0033   0.0016
 'International Tables Vol C Tables 4.2.6.8 and 6.1.1.4'
 'H'  'H'   0.0000   0.0000
 'International Tables Vol C Tables 4.2.6.8 and 6.1.1.4'
 'N'  'N'   0.0061   0.0033
 'International Tables Vol C Tables 4.2.6.8 and 6.1.1.4'
 'O'  'O'   0.0106   0.0060
 'International Tables Vol C Tables 4.2.6.8 and 6.1.1.4'
 
_symmetry_cell_setting            monoclinic
_symmetry_space_group_name_H-M    'P 21/c'
 
loop_
 _symmetry_equiv_pos_as_xyz
 'x, y, z'
 '-x, y+1/2, -z+1/2'
 '-x, -y, -z'
 'x, -y-1/2, z-1/2'
 
_cell_length_a                    11.8911(3)
_cell_length_b                    9.3355(3)
_cell_length_c                    19.5017(7)
_cell_angle_alpha                 90.00
_cell_angle_beta                  104.5590(10)
_cell_angle_gamma                 90.00
_cell_volume                      2095.36(11)
_cell_formula_units_Z             4
_cell_measurement_temperature     293(2)
_cell_measurement_reflns_used     8661
_cell_measurement_theta_min       2.037
_cell_measurement_theta_max       25.028
 
_exptl_crystal_description        prism
_exptl_crystal_colour             yellow
_exptl_crystal_size_max           0.32
_exptl_crystal_size_mid           0.16
_exptl_crystal_size_min           0.11
_exptl_crystal_density_meas       ?
_exptl_crystal_density_diffrn     1.285
_exptl_crystal_density_method     'not measured'
_exptl_crystal_F_000              848
_exptl_absorpt_coefficient_mu     0.084
_exptl_absorpt_correction_type    multi-scan
_exptl_absorpt_correction_T_min   0.9094
_exptl_absorpt_correction_T_max   1.1097
_exptl_absorpt_process_details
;
 ?
;
 
_exptl_special_details
;
 ?
;
 
_diffrn_ambient_temperature       293(2)
_diffrn_radiation_wavelength      0.71073
_diffrn_radiation_type            MoK\a
_diffrn_radiation_source          'fine-focus sealed tube'
_diffrn_radiation_monochromator   graphite
_diffrn_measurement_device_type   KappaCCD
_diffrn_measurement_method        'CCD rotation images, thick slices'
_diffrn_detector_area_resol_mean  9
_diffrn_standards_number          ?
_diffrn_standards_interval_count  ?
_diffrn_standards_interval_time   ?
_diffrn_standards_decay_%         ?
_diffrn_reflns_number             13743
_diffrn_reflns_av_R_equivalents   0.0756
_diffrn_reflns_av_sigmaI/netI     0.0769
_diffrn_reflns_limit_h_min        -14
_diffrn_reflns_limit_h_max        10
_diffrn_reflns_limit_k_min        -10
_diffrn_reflns_limit_k_max        11
_diffrn_reflns_limit_l_min        -18
_diffrn_reflns_limit_l_max        23
_diffrn_reflns_theta_min          2.16
_diffrn_reflns_theta_max          25.06
_reflns_number_total              3701
_reflns_number_gt                 1985
_reflns_threshold_expression      >2sigma(I)
 
_computing_data_collection        'Collect (Nonius BV, 1997-2000)'
_computing_cell_refinement        'HKL Scalepack (Otwinowski & Minor 1997)'
_computing_data_reduction         'HKL Denzo and Scalepack'
_computing_structure_solution     'SHELXS-86 (Sheldrick, 1986)'
_computing_structure_refinement   'SHELXL-97 (Sheldrick, 1997)'
_computing_molecular_graphics     'Ortep-3 for Windows (Farrugia, 1997)'
_computing_publication_material   'WinGX publication routines (Farrugia, 1999)'
 
_refine_special_details
;
 Refinement of F^2^ against ALL reflections.  The weighted R-factor wR and
 goodness of fit S are based on F^2^, conventional R-factors R are based
 on F, with F set to zero for negative F^2^. The threshold expression of
 F^2^ > 2sigma(F^2^) is used only for calculating R-factors(gt) etc. and is
 not relevant to the choice of reflections for refinement.  R-factors based
 on F^2^ are statistically about twice as large as those based on F, and R-
 factors based on ALL data will be even larger.
;
 
_refine_ls_structure_factor_coef  Fsqd
_refine_ls_matrix_type            full
_refine_ls_weighting_scheme       calc
_refine_ls_weighting_details
 'calc w=1/[\s^2^(Fo^2^)+(0.0948P)^2^+0.3863P] where P=(Fo^2^+2Fc^2^)/3'
_atom_sites_solution_primary      direct
_atom_sites_solution_secondary    difmap
_atom_sites_solution_hydrogens    geom
_refine_ls_hydrogen_treatment     fixed
_refine_ls_extinction_method      none
_refine_ls_extinction_coef        ?
_refine_ls_number_reflns          3701
_refine_ls_number_parameters      280
_refine_ls_number_restraints      0
_refine_ls_R_factor_all           0.1426
_refine_ls_R_factor_gt            0.0669
_refine_ls_wR_factor_ref          0.2017
_refine_ls_wR_factor_gt           0.1564
_refine_ls_goodness_of_fit_ref    1.030
_refine_ls_restrained_S_all       1.030
_refine_ls_shift/su_max           0.000
_refine_ls_shift/su_mean          0.000
 
loop_
 _atom_site_label
 _atom_site_type_symbol
 _atom_site_fract_x
 _atom_site_fract_y
 _atom_site_fract_z
 _atom_site_U_iso_or_equiv
 _atom_site_adp_type
 _atom_site_occupancy
 _atom_site_symmetry_multiplicity
 _atom_site_calc_flag
 _atom_site_refinement_flags
 _atom_site_disorder_assembly
 _atom_site_disorder_group
O1 O 0.5372(2) 0.1645(4) 0.48367(17) 0.1131(12) Uani 1 1 d . . .
O2 O 0.5176(2) 0.0855(5) 0.3785(2) 0.1248(14) Uani 1 1 d . . .
O3 O 0.5135(2) -0.0331(4) 0.14827(16) 0.1158(13) Uani 1 1 d . . .
N1 N 0.4777(3) 0.1269(4) 0.4263(2) 0.0849(11) Uani 1 1 d . . .
C1 C 0.3507(3) 0.1297(4) 0.41448(19) 0.0627(10) Uani 1 1 d . . .
C2 C 0.3049(3) 0.1467(4) 0.47214(18) 0.0685(11) Uani 1 1 d . . .
H2 H 0.3533 0.1608 0.5171 0.082 Uiso 1 1 calc R . .
C3 C 0.1866(3) 0.1426(4) 0.46214(17) 0.0632(10) Uani 1 1 d . . .
H3 H 0.1539 0.1550 0.5003 0.076 Uiso 1 1 calc R . .
C4 C 0.1161(3) 0.1197(4) 0.39483(16) 0.0500(9) Uani 1 1 d . . .
C5 C 0.1644(2) 0.1037(4) 0.33637(15) 0.0456(8) Uani 1 1 d . . .
C6 C 0.2836(3) 0.1097(4) 0.34640(17) 0.0549(9) Uani 1 1 d . . .
H6 H 0.3174 0.1006 0.3085 0.066 Uiso 1 1 calc R . .
C7 C -0.0093(3) 0.1043(4) 0.37073(17) 0.0514(9) Uani 1 1 d . . .
C8 C -0.0922(3) 0.1013(4) 0.40922(19) 0.0643(11) Uani 1 1 d . . .
H8 H -0.0715 0.1181 0.4578 0.077 Uiso 1 1 calc R . .
C9 C -0.2055(3) 0.0732(5) 0.3749(2) 0.0721(12) Uani 1 1 d . . .
H9 H -0.2625 0.0743 0.3999 0.087 Uiso 1 1 calc R . .
C10 C -0.2351(3) 0.0433(4) 0.3031(2) 0.0685(11) Uani 1 1 d . . .
H10 H -0.3117 0.0201 0.2810 0.082 Uiso 1 1 calc R . .
C11 C -0.1536(3) 0.0471(4) 0.26314(19) 0.0603(10) Uani 1 1 d . . .
H11 H -0.1750 0.0270 0.2149 0.072 Uiso 1 1 calc R . .
C12 C -0.0386(3) 0.0818(4) 0.29691(17) 0.0488(9) Uani 1 1 d . . .
C13 C 0.0682(2) 0.0858(4) 0.27131(16) 0.0481(9) Uani 1 1 d . . .
C14 C 0.0776(3) 0.0811(4) 0.20315(16) 0.0486(9) Uani 1 1 d . . .
C15 C -0.0229(3) 0.1029(4) 0.14105(16) 0.0483(9) Uani 1 1 d . . .
C16 C -0.0474(3) 0.0055(4) 0.08598(18) 0.0652(11) Uani 1 1 d . . .
H16 H -0.0009 -0.0753 0.0878 0.078 Uiso 1 1 calc R . .
C17 C -0.1409(3) 0.0273(5) 0.02803(19) 0.0736(12) Uani 1 1 d . . .
H17 H -0.1575 -0.0399 -0.0083 0.088 Uiso 1 1 calc R . .
C18 C -0.2089(3) 0.1464(5) 0.02383(18) 0.0644(11) Uani 1 1 d . . .
H18 H -0.2716 0.1602 -0.0151 0.077 Uiso 1 1 calc R . .
C19 C -0.1843(3) 0.2450(4) 0.07720(19) 0.0638(10) Uani 1 1 d . . .
H19 H -0.2297 0.3270 0.0742 0.077 Uiso 1 1 calc R . .
C20 C -0.0920(3) 0.2237(4) 0.13567(17) 0.0569(9) Uani 1 1 d . . .
H20 H -0.0763 0.2914 0.1718 0.068 Uiso 1 1 calc R . .
C21 C 0.1919(3) 0.0557(4) 0.18697(15) 0.0481(9) Uani 1 1 d . . .
C22 C 0.2457(3) 0.1602(5) 0.15667(18) 0.0697(11) Uani 1 1 d . . .
H22 H 0.2090 0.2478 0.1444 0.084 Uiso 1 1 calc R . .
C23 C 0.3546(4) 0.1359(6) 0.1442(2) 0.0851(14) Uani 1 1 d . . .
H23 H 0.3915 0.2082 0.1254 0.102 Uiso 1 1 calc R . .
C24 C 0.4070(3) 0.0045(6) 0.1600(2) 0.0756(13) Uani 1 1 d . . .
C25 C 0.3532(3) -0.1000(5) 0.1883(2) 0.0779(12) Uani 1 1 d . . .
H25 H 0.3885 -0.1890 0.1986 0.094 Uiso 1 1 calc R . .
C26 C 0.2473(3) -0.0747(4) 0.2018(2) 0.0676(11) Uani 1 1 d . . .
H26 H 0.2118 -0.1473 0.2214 0.081 Uiso 1 1 calc R . .
C27 C 0.5671(4) 0.0602(8) 0.1113(3) 0.158(3) Uani 1 1 d . . .
H27A H 0.6398 0.0202 0.1079 0.237 Uiso 1 1 calc R . .
H27B H 0.5807 0.1502 0.1359 0.237 Uiso 1 1 calc R . .
H27C H 0.5179 0.0749 0.0647 0.237 Uiso 1 1 calc R . .
 
loop_
 _atom_site_aniso_label
 _atom_site_aniso_U_11
 _atom_site_aniso_U_22
 _atom_site_aniso_U_33
 _atom_site_aniso_U_23
 _atom_site_aniso_U_13
 _atom_site_aniso_U_12
O1 0.0639(17) 0.151(3) 0.100(2) -0.008(2) -0.0250(17) -0.0247(18)
O2 0.0444(16) 0.219(5) 0.110(3) -0.005(3) 0.0176(17) -0.0021(19)
O3 0.0590(17) 0.199(4) 0.098(2) 0.011(2) 0.0374(16) -0.0074(19)
N1 0.0451(19) 0.117(3) 0.084(3) 0.004(2) 0.000(2) -0.0074(19)
C1 0.045(2) 0.076(3) 0.063(2) 0.002(2) 0.0053(17) -0.0055(17)
C2 0.060(2) 0.084(3) 0.052(2) -0.007(2) -0.0045(18) -0.003(2)
C3 0.070(2) 0.075(3) 0.044(2) -0.0052(18) 0.0132(17) 0.0059(19)
C4 0.0490(18) 0.056(3) 0.0466(19) 0.0024(16) 0.0150(15) 0.0065(16)
C5 0.0386(17) 0.052(2) 0.0442(18) 0.0010(16) 0.0072(14) 0.0014(15)
C6 0.0447(19) 0.072(3) 0.0465(19) -0.0012(17) 0.0087(15) -0.0018(16)
C7 0.0440(18) 0.061(3) 0.052(2) 0.0046(17) 0.0160(15) 0.0068(16)
C8 0.055(2) 0.080(3) 0.062(2) 0.009(2) 0.0223(18) 0.0126(19)
C9 0.056(2) 0.092(3) 0.077(3) 0.023(2) 0.032(2) 0.012(2)
C10 0.0359(18) 0.078(3) 0.091(3) 0.023(2) 0.0142(19) 0.0033(17)
C11 0.043(2) 0.068(3) 0.066(2) 0.0108(19) 0.0072(17) 0.0018(17)
C12 0.0430(18) 0.051(2) 0.052(2) 0.0068(17) 0.0110(15) 0.0059(15)
C13 0.0430(17) 0.053(2) 0.0479(18) -0.0012(17) 0.0112(15) 0.0041(15)
C14 0.0525(19) 0.048(2) 0.0448(18) 0.0001(16) 0.0114(15) 0.0009(15)
C15 0.0501(18) 0.055(3) 0.0394(18) -0.0004(17) 0.0097(14) 0.0022(17)
C16 0.064(2) 0.069(3) 0.060(2) -0.013(2) 0.0091(18) 0.0088(19)
C17 0.070(3) 0.088(4) 0.055(2) -0.023(2) 0.003(2) 0.001(2)
C18 0.060(2) 0.085(3) 0.045(2) 0.007(2) 0.0063(17) 0.001(2)
C19 0.060(2) 0.067(3) 0.060(2) 0.011(2) 0.0089(18) 0.0086(19)
C20 0.062(2) 0.055(3) 0.050(2) -0.0023(18) 0.0079(17) 0.0059(19)
C21 0.0474(18) 0.058(3) 0.0376(17) -0.0037(17) 0.0086(14) -0.0043(17)
C22 0.067(2) 0.082(3) 0.057(2) 0.024(2) 0.0086(18) -0.007(2)
C23 0.068(3) 0.125(5) 0.062(2) 0.028(3) 0.017(2) -0.029(3)
C24 0.051(2) 0.121(4) 0.057(2) -0.001(3) 0.0188(19) -0.008(3)
C25 0.062(2) 0.085(4) 0.096(3) -0.004(2) 0.036(2) 0.004(2)
C26 0.061(2) 0.062(3) 0.089(3) 0.001(2) 0.036(2) -0.001(2)
C27 0.082(3) 0.277(9) 0.129(5) 0.054(5) 0.054(3) -0.024(4)
 
_geom_special_details
;
 All esds (except the esd in the dihedral angle between two l.s. planes)
 are estimated using the full covariance matrix.  The cell esds are taken
 into account individually in the estimation of esds in distances, angles
 and torsion angles; correlations between esds in cell parameters are only
 used when they are defined by crystal symmetry.  An approximate (isotropic)
 treatment of cell esds is used for estimating esds involving l.s. planes.
;
 
loop_
 _geom_bond_atom_site_label_1
 _geom_bond_atom_site_label_2
 _geom_bond_distance
 _geom_bond_site_symmetry_2
 _geom_bond_publ_flag
O1 N1 1.215(4) . ?
O2 N1 1.211(4) . ?
O3 C27 1.383(6) . ?
O3 C24 1.388(5) . ?
N1 C1 1.469(4) . ?
C1 C2 1.377(5) . ?
C1 C6 1.379(4) . ?
C2 C3 1.371(5) . ?
C2 H2 0.9300 . ?
C3 C4 1.385(4) . ?
C3 H3 0.9300 . ?
C4 C5 1.408(4) . ?
C4 C7 1.454(4) . ?
C5 C6 1.382(4) . ?
C5 C13 1.489(4) . ?
C6 H6 0.9300 . ?
C7 C8 1.382(4) . ?
C7 C12 1.409(4) . ?
C8 C9 1.370(5) . ?
C8 H8 0.9300 . ?
C9 C10 1.384(5) . ?
C9 H9 0.9300 . ?
C10 C11 1.388(5) . ?
C10 H10 0.9300 . ?
C11 C12 1.398(4) . ?
C11 H11 0.9300 . ?
C12 C13 1.478(4) . ?
C13 C14 1.362(4) . ?
C14 C15 1.486(4) . ?
C14 C21 1.490(4) . ?
C15 C16 1.381(5) . ?
C15 C20 1.384(5) . ?
C16 C17 1.387(5) . ?
C16 H16 0.9300 . ?
C17 C18 1.365(5) . ?
C17 H17 0.9300 . ?
C18 C19 1.365(5) . ?
C18 H18 0.9300 . ?
C19 C20 1.384(5) . ?
C19 H19 0.9300 . ?
C20 H20 0.9300 . ?
C21 C26 1.380(5) . ?
C21 C22 1.378(5) . ?
C22 C23 1.393(5) . ?
C22 H22 0.9300 . ?
C23 C24 1.376(6) . ?
C23 H23 0.9300 . ?
C24 C25 1.357(6) . ?
C25 C26 1.370(5) . ?
C25 H25 0.9300 . ?
C26 H26 0.9300 . ?
C27 H27A 0.9600 . ?
C27 H27B 0.9600 . ?
C27 H27C 0.9600 . ?
 
loop_
 _geom_angle_atom_site_label_1
 _geom_angle_atom_site_label_2
 _geom_angle_atom_site_label_3
 _geom_angle
 _geom_angle_site_symmetry_1
 _geom_angle_site_symmetry_3
 _geom_angle_publ_flag
C27 O3 C24 119.1(5) . . ?
O2 N1 O1 123.4(4) . . ?
O2 N1 C1 118.1(4) . . ?
O1 N1 C1 118.5(4) . . ?
C2 C1 C6 123.3(3) . . ?
C2 C1 N1 118.4(3) . . ?
C6 C1 N1 118.2(3) . . ?
C3 C2 C1 118.9(3) . . ?
C3 C2 H2 120.5 . . ?
C1 C2 H2 120.5 . . ?
C2 C3 C4 119.6(3) . . ?
C2 C3 H3 120.2 . . ?
C4 C3 H3 120.2 . . ?
C3 C4 C5 120.7(3) . . ?
C3 C4 C7 130.5(3) . . ?
C5 C4 C7 108.8(3) . . ?
C6 C5 C4 119.6(3) . . ?
C6 C5 C13 131.8(3) . . ?
C4 C5 C13 108.6(2) . . ?
C1 C6 C5 117.8(3) . . ?
C1 C6 H6 121.1 . . ?
C5 C6 H6 121.1 . . ?
C8 C7 C12 121.6(3) . . ?
C8 C7 C4 129.8(3) . . ?
C12 C7 C4 108.4(3) . . ?
C9 C8 C7 119.1(3) . . ?
C9 C8 H8 120.4 . . ?
C7 C8 H8 120.4 . . ?
C8 C9 C10 120.1(3) . . ?
C8 C9 H9 120.0 . . ?
C10 C9 H9 120.0 . . ?
C9 C10 C11 121.8(3) . . ?
C9 C10 H10 119.1 . . ?
C11 C10 H10 119.1 . . ?
C10 C11 C12 118.6(3) . . ?
C10 C11 H11 120.7 . . ?
C12 C11 H11 120.7 . . ?
C11 C12 C7 118.5(3) . . ?
C11 C12 C13 132.0(3) . . ?
C7 C12 C13 109.2(3) . . ?
C14 C13 C12 128.1(3) . . ?
C14 C13 C5 127.0(3) . . ?
C12 C13 C5 104.9(3) . . ?
C13 C14 C15 123.0(3) . . ?
C13 C14 C21 121.0(3) . . ?
C15 C14 C21 116.0(3) . . ?
C16 C15 C20 118.2(3) . . ?
C16 C15 C14 120.9(3) . . ?
C20 C15 C14 120.9(3) . . ?
C15 C16 C17 120.4(4) . . ?
C15 C16 H16 119.8 . . ?
C17 C16 H16 119.8 . . ?
C18 C17 C16 120.7(4) . . ?
C18 C17 H17 119.7 . . ?
C16 C17 H17 119.7 . . ?
C19 C18 C17 119.6(3) . . ?
C19 C18 H18 120.2 . . ?
C17 C18 H18 120.2 . . ?
C18 C19 C20 120.3(4) . . ?
C18 C19 H19 119.8 . . ?
C20 C19 H19 119.8 . . ?
C19 C20 C15 120.8(3) . . ?
C19 C20 H20 119.6 . . ?
C15 C20 H20 119.6 . . ?
C26 C21 C22 117.7(3) . . ?
C26 C21 C14 120.6(3) . . ?
C22 C21 C14 121.7(3) . . ?
C21 C22 C23 120.8(4) . . ?
C21 C22 H22 119.6 . . ?
C23 C22 H22 119.6 . . ?
C24 C23 C22 119.6(4) . . ?
C24 C23 H23 120.2 . . ?
C22 C23 H23 120.2 . . ?
C25 C24 C23 119.9(4) . . ?
C25 C24 O3 115.4(5) . . ?
C23 C24 O3 124.7(4) . . ?
C24 C25 C26 120.3(4) . . ?
C24 C25 H25 119.9 . . ?
C26 C25 H25 119.9 . . ?
C25 C26 C21 121.7(4) . . ?
C25 C26 H26 119.2 . . ?
C21 C26 H26 119.2 . . ?
O3 C27 H27A 109.5 . . ?
O3 C27 H27B 109.5 . . ?
H27A C27 H27B 109.5 . . ?
O3 C27 H27C 109.5 . . ?
H27A C27 H27C 109.5 . . ?
H27B C27 H27C 109.5 . . ?
 
_diffrn_measured_fraction_theta_max    0.997
_diffrn_reflns_theta_full              25.06
_diffrn_measured_fraction_theta_full   0.997
_refine_diff_density_max    0.225
_refine_diff_density_min   -0.258
_refine_diff_density_rms    0.056
